# Supplementary material for: Flexible linkers in CaMKII control the balance between activating and inhibitory autophosphorylation
Source: eLife journal article supplement (doi:10.7554/elife.53670), 2020-03-09
Supplement: supp [file elife-53670-supp-v1.zip]

Figure 7-figure supplement 2: Measurement of dephosphorylation kinetics in solution

(a)

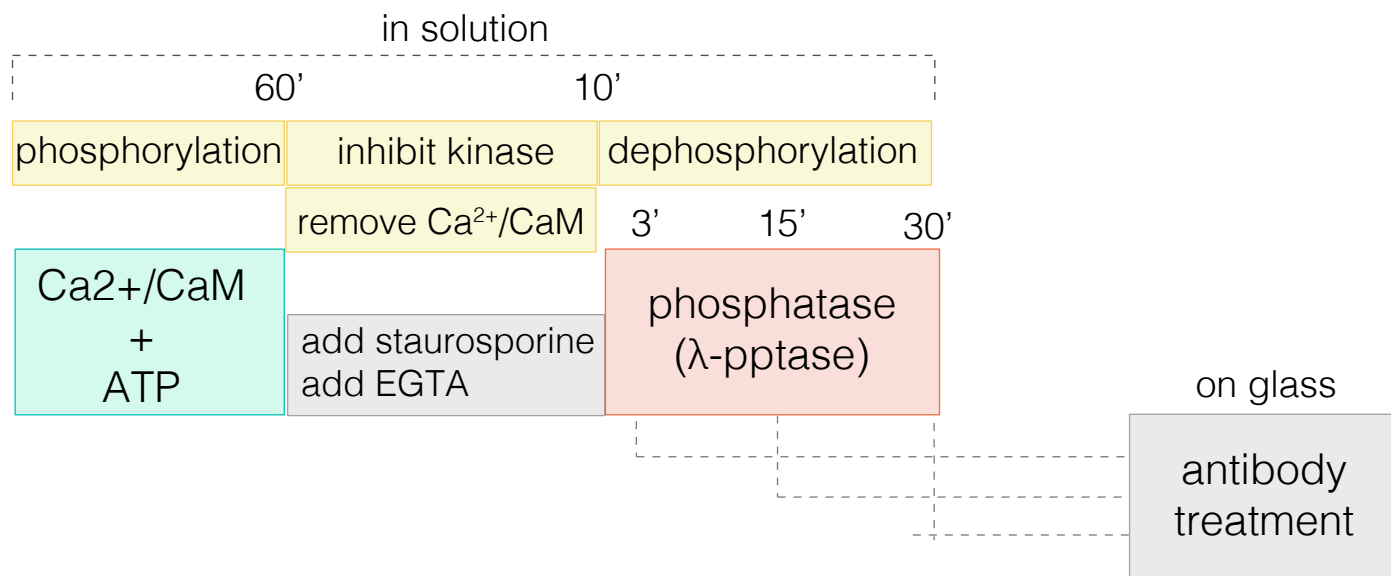

(b)

fraction of CaMKII holoenzyme with detectable inhibitory phosphorylation

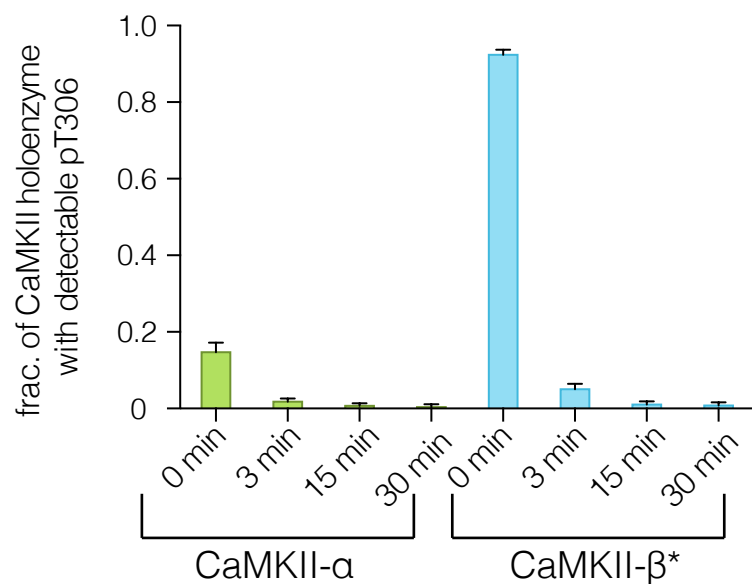

fraction of CaMKII holoenzyme with detectable activating phosphorylation

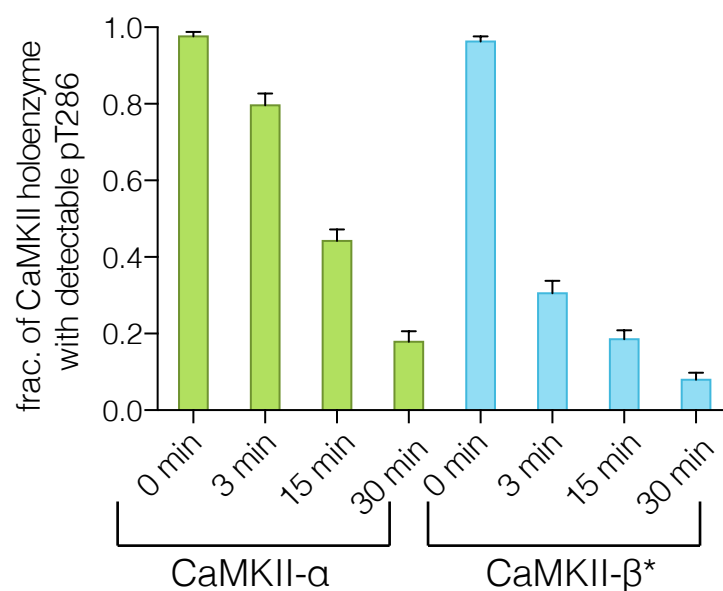

(c)

extent of activating phosphorylation per CaMKII-α holoenzymes

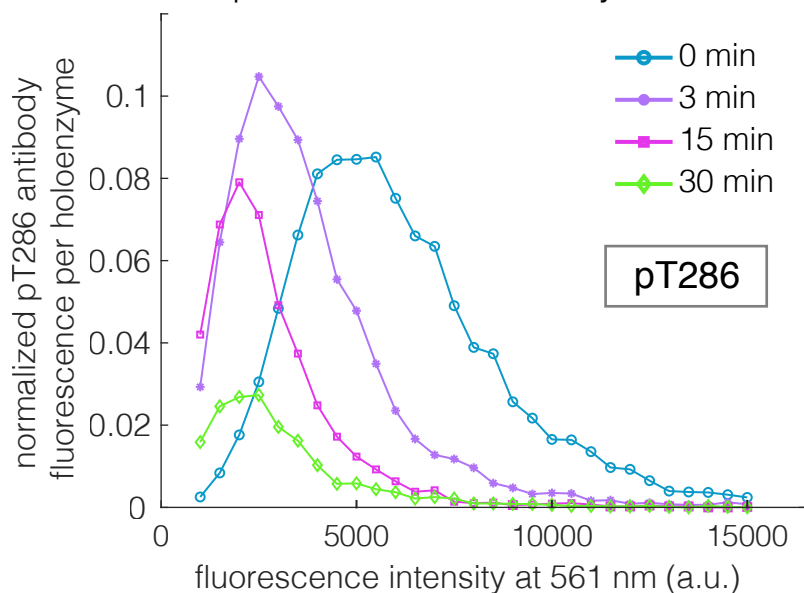

extent of activating phosphorylation per CaMKII-β\* holoenzymes

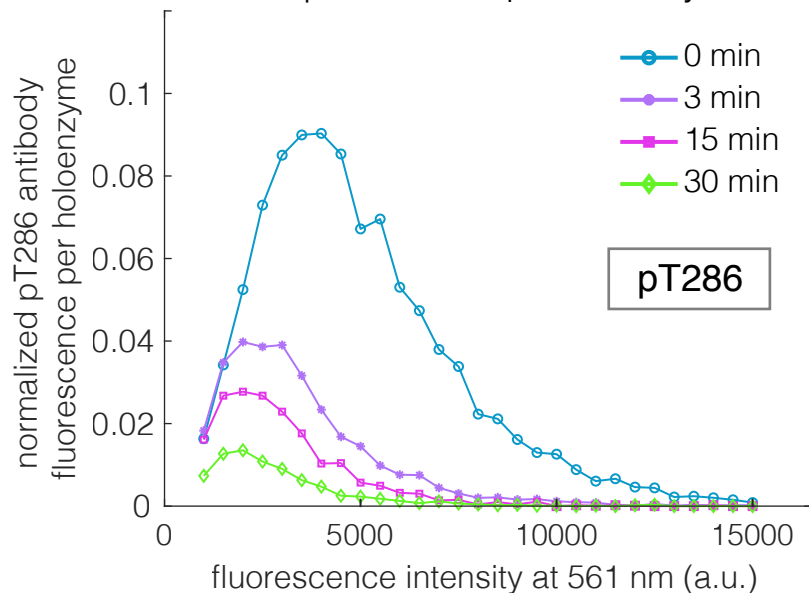

low phosphorylation per holoenzyme

high phosphorylation per holoenzyme

low phosphorylation per holoenzyme

high phosphorylation per holoenzyme
