# Supplementary material for: Flexible linkers in CaMKII control the balance between activating and inhibitory autophosphorylation
Source: eLife journal article supplement (doi:10.7554/elife.53670), 2020-03-09

Figure1-figure supplement 1: Amino acid sequences for the kinase-hub linker in the four isoforms of human CaMKII

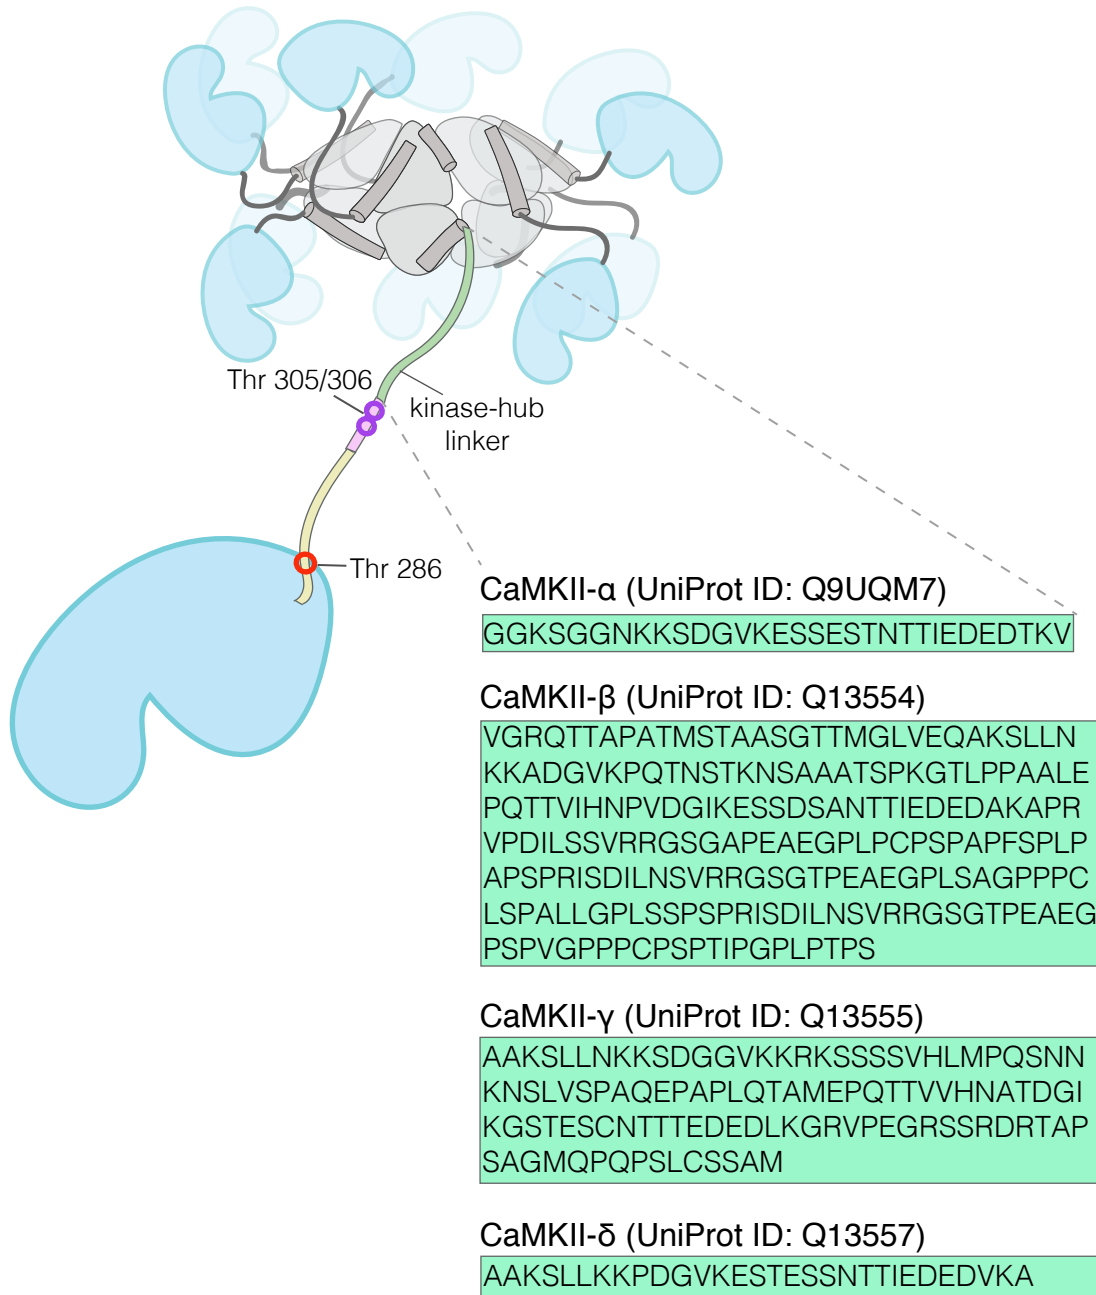

Supplement: supp [file elife-53670-supp-v1.zip]
