# Supplementary material for: Flexible linkers in CaMKII control the balance between activating and inhibitory autophosphorylation
Source: eLife journal article supplement (doi:10.7554/elife.53670), 2020-03-09

Figure 8-figure supplement 1: Effect of addition of  $\text{Ca}^{2+}$ / $\text{CaM}$  on the rates of dephosphorylation at the autonomy site

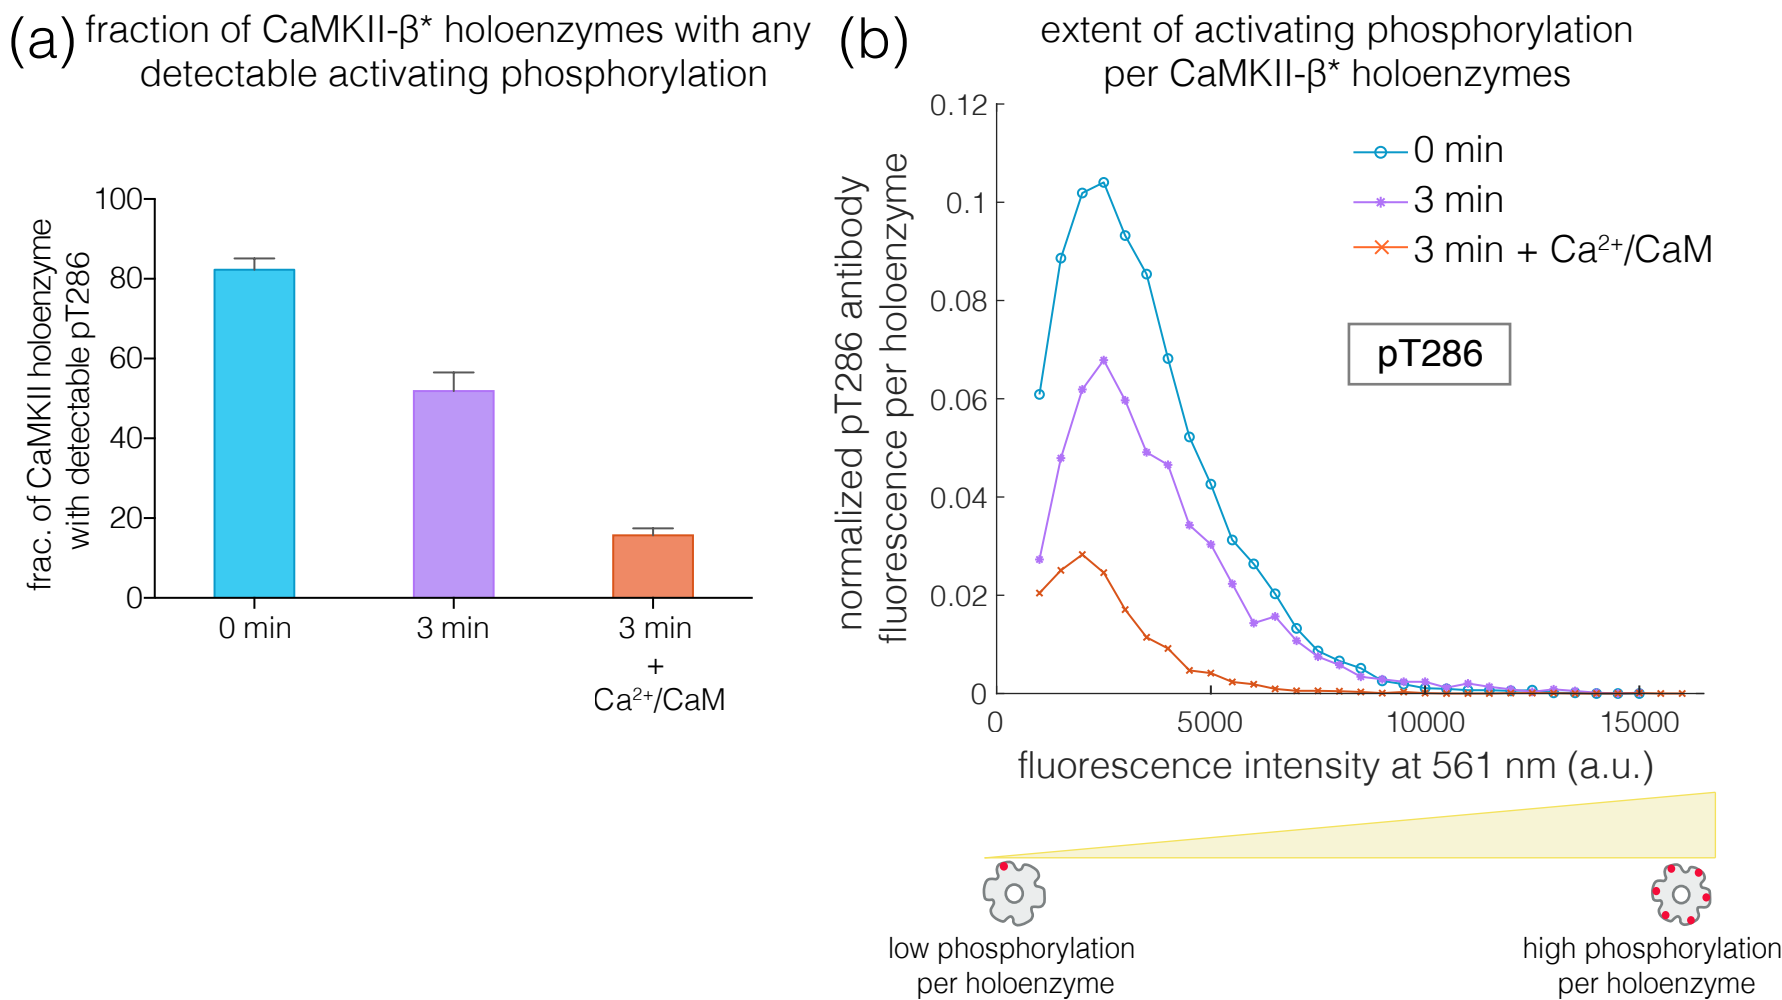

Supplement: supp [file elife-53670-supp-v1.zip]
