# Supplementary material for: Flexible linkers in CaMKII control the balance between activating and inhibitory autophosphorylation
Source: eLife journal article supplement (doi:10.7554/elife.53670), 2020-03-09
Supplement: supp [file elife-53670-supp-v1.zip]

Archive with 13 entries (13 files):
- elife_poa_e53670_Transparent_Reporting_File.docx
- elife_poa_e53670_Figure_3_figure_supplement_2.pdf
- elife_poa_e53670_Appendix_figure_1.pdf
- elife_poa_e53670_Figure_3_figure_supplement_3.pdf
- elife_poa_e53670_Figure_5_figure_supplement_1.pdf
- elife_poa_e53670_Figure_7_figure_supplement_2.pdf
- elife_poa_e53670_Figure_7_figure_supplement_1.pdf
- elife_poa_e53670_Figure_3_figure_supplement_1.pdf
- elife_poa_e53670_Figure_7_figure_supplement_3.pdf
- elife_poa_e53670_Source_code_1.zip
- elife_poa_e53670_Figure_8_figure_supplement_1.pdf
- elife_poa_e53670_Figure_1_figure_supplement_1.pdf
- elife_poa_e53670_Figure_2_figure_supplement_1.pdf
