# Supplementary material for: Flexible linkers in CaMKII control the balance between activating and inhibitory autophosphorylation
Source: eLife journal article supplement (doi:10.7554/elife.53670), 2020-03-09

Figure 7-figure supplement 1: Effect of phosphatases on dephosphorylation kinetics when kinase activity is switched off

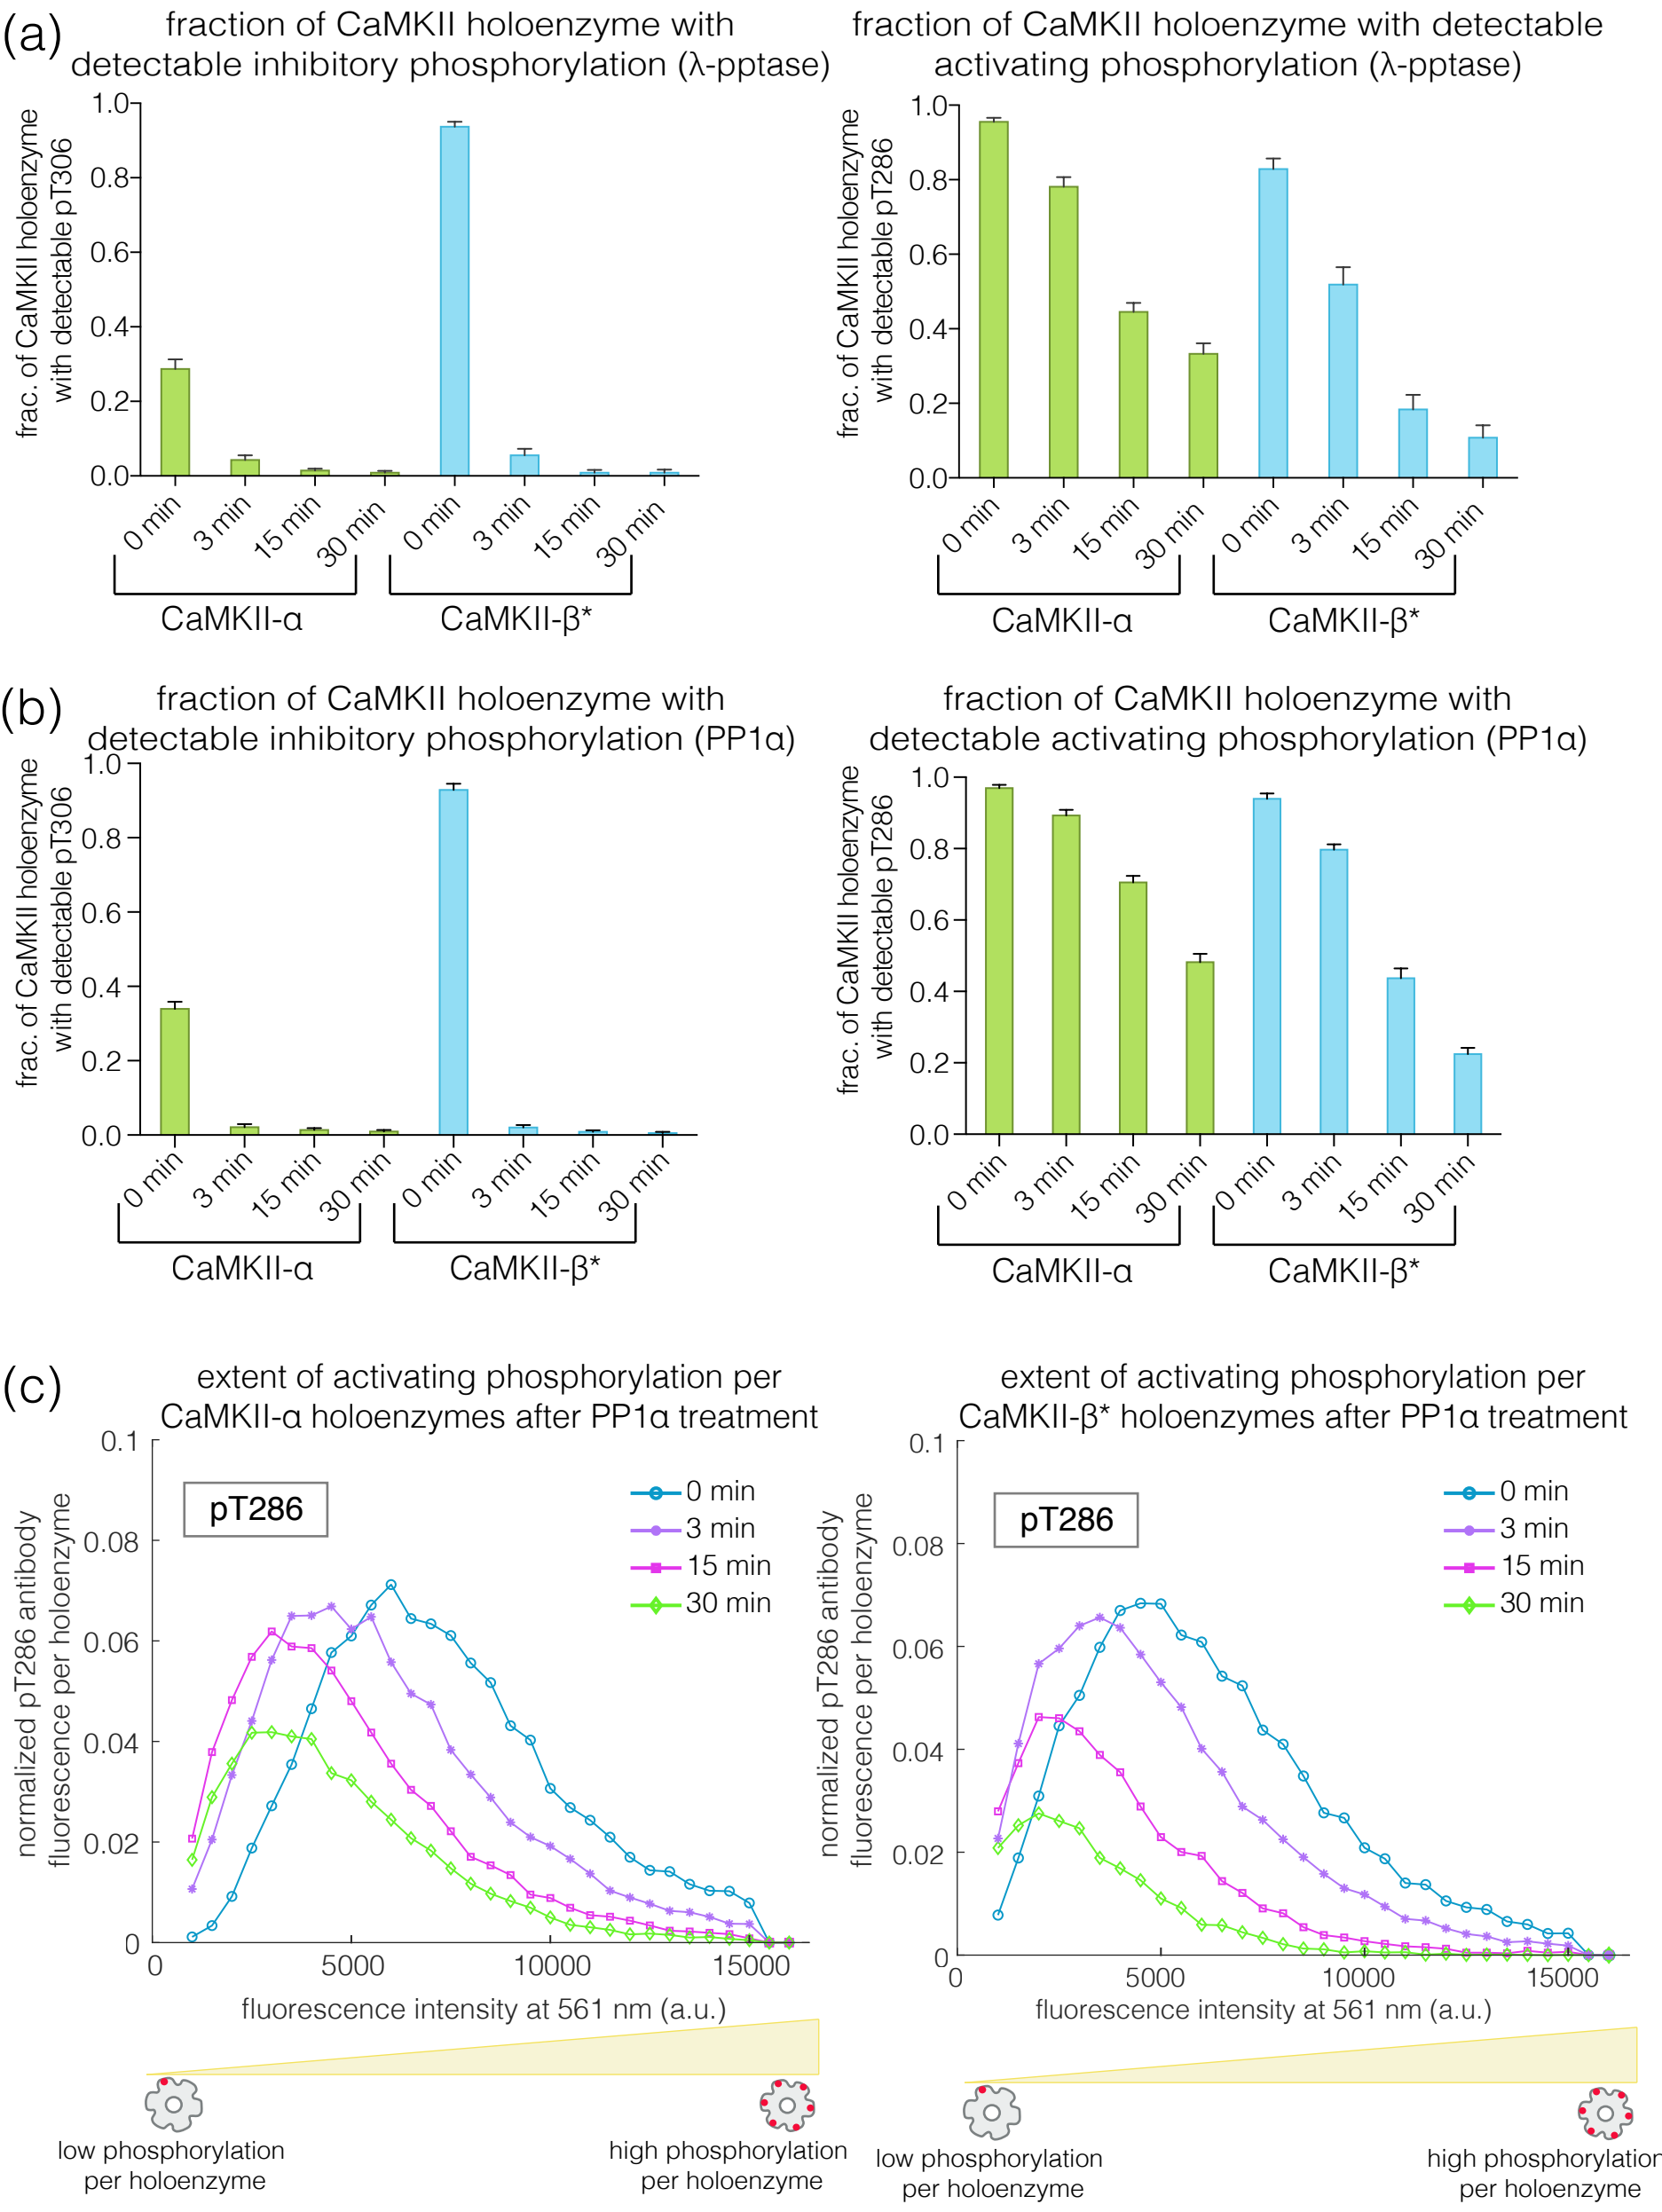

Supplement: supp [file elife-53670-supp-v1.zip › elife_poa_e53670_Figure_7_figure_supplement_1.pdf]
