# Supplementary figures and images for: Flexible linkers in CaMKII control the balance between activating and inhibitory autophosphorylation
Source: eLife journal article supplement (doi:10.7554/elife.53670), 2020-03-09

# Appendix-figure 1: A summary of the reactions considered in the kinetic model

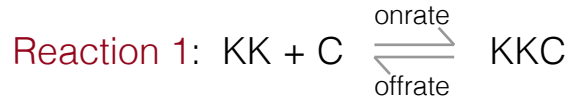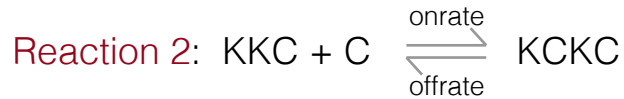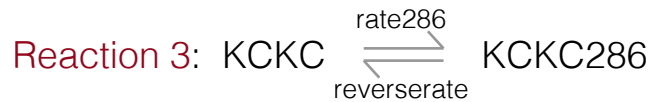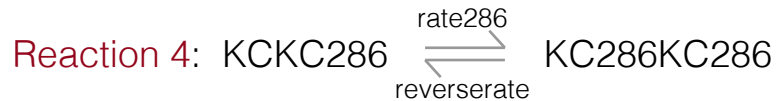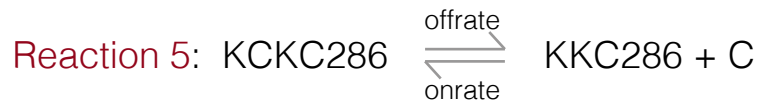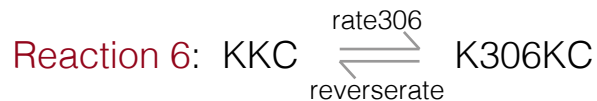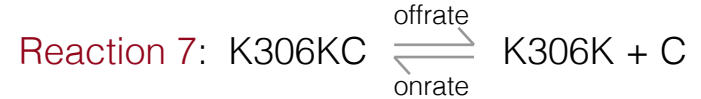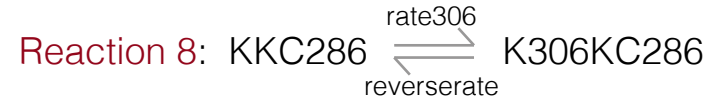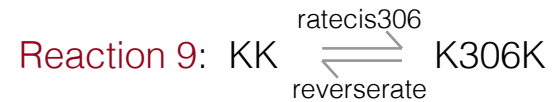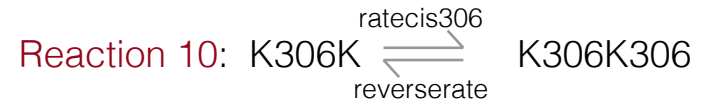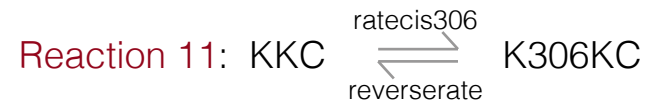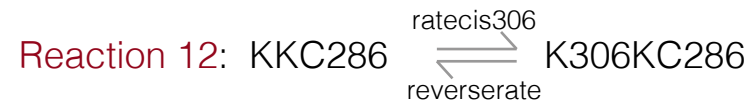

Supplement: supp [file elife-53670-supp-v1.zip]

Figure 7-figure supplement 3: Inhibition of CaMKII kinase activity by staurosporine

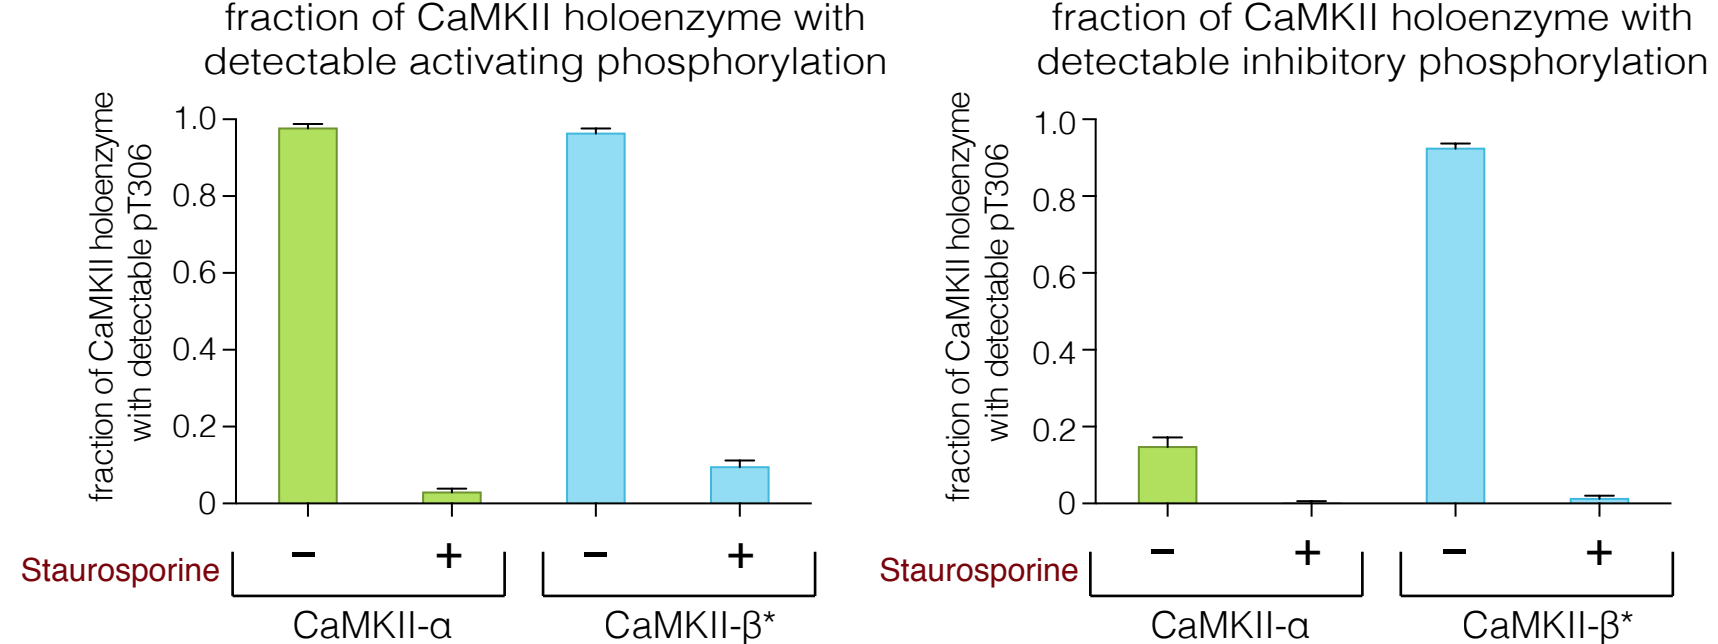

Supplement: supp [file elife-53670-supp-v1.zip]

# Figure 2-figure supplement 1: Validation of phosphospecific antibodies

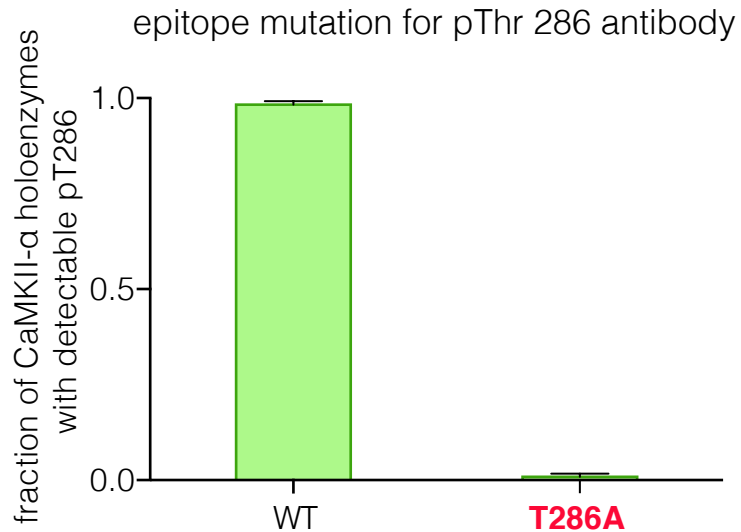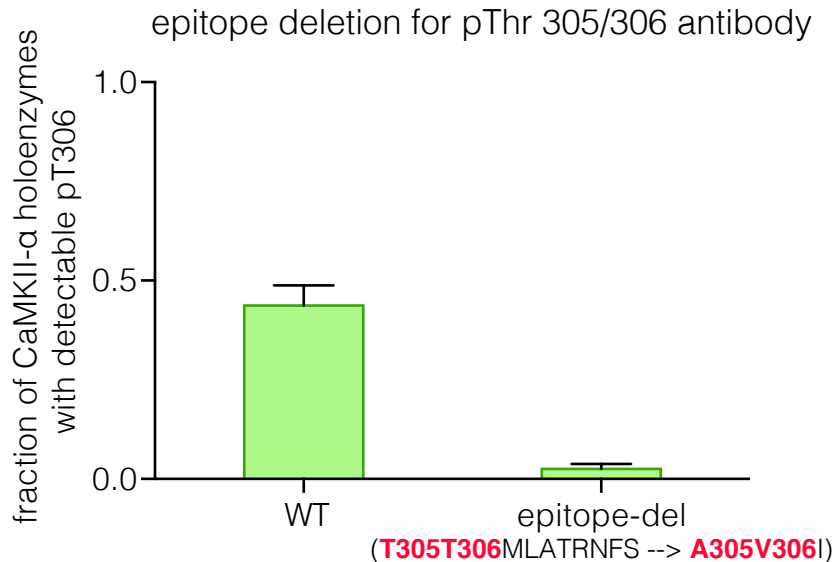

Supplement: supp [file elife-53670-supp-v1.zip]

Figure 3-figure supplement 1: Inhibitory autophosphorylation status in activated CaMKII-α

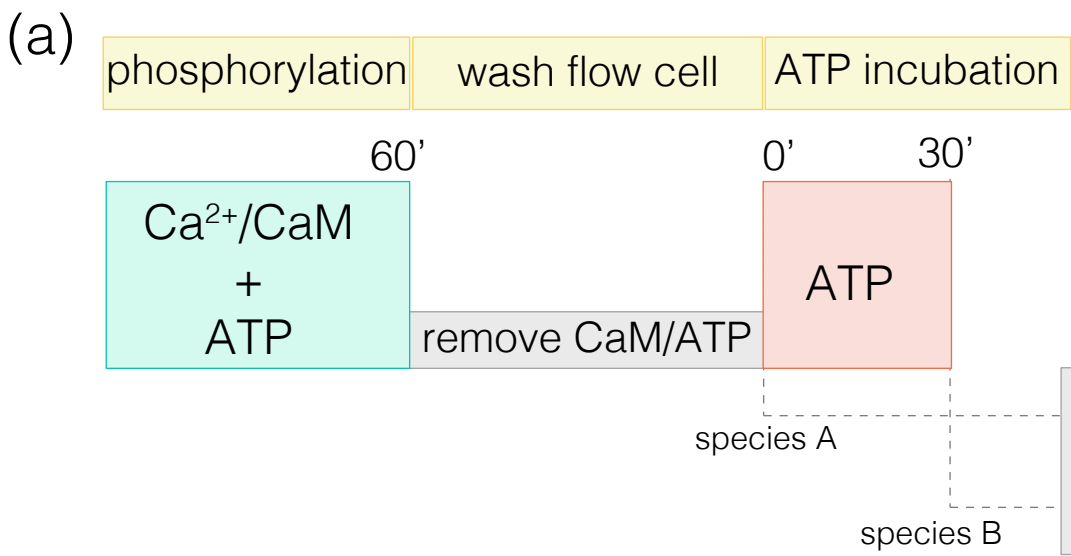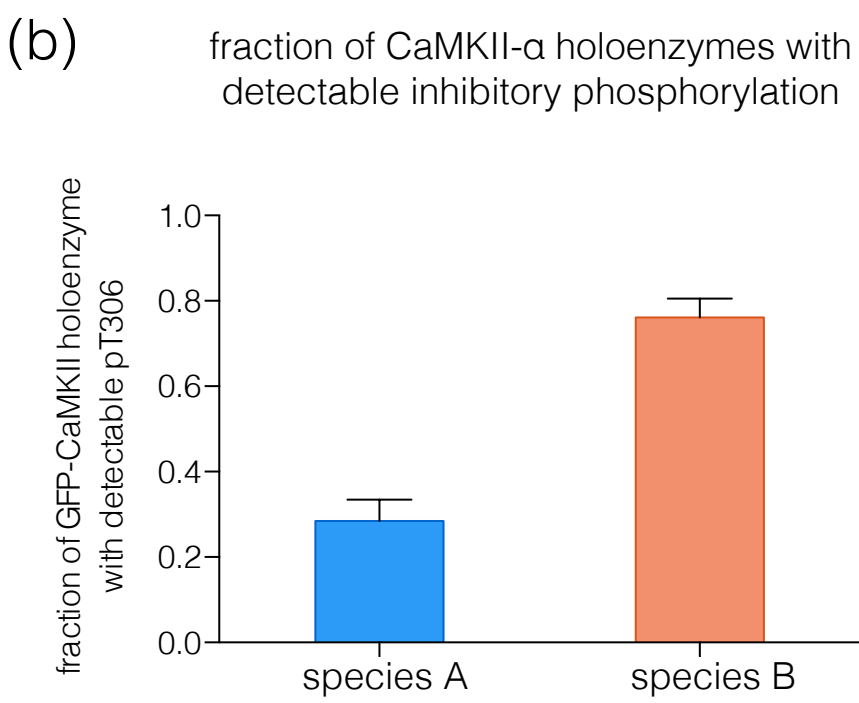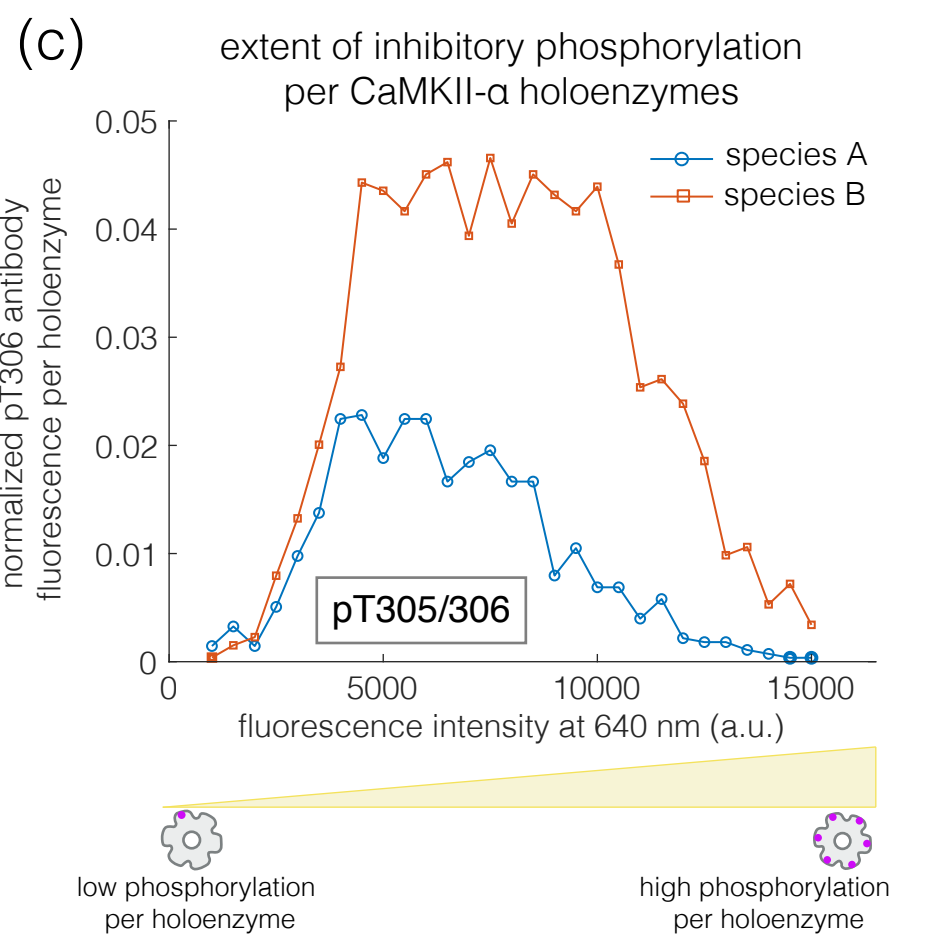

Supplement: supp [file elife-53670-supp-v1.zip]

Figure 7-figure supplement 2: Measurement of dephosphorylation kinetics in solution

(a)

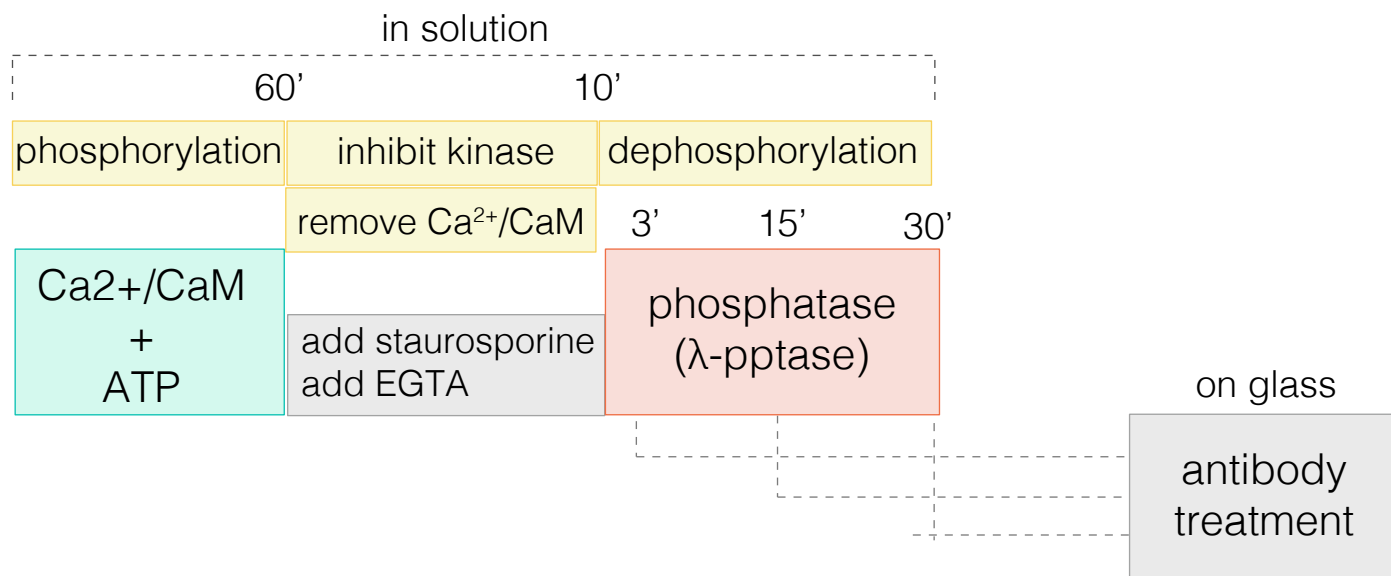

(b)

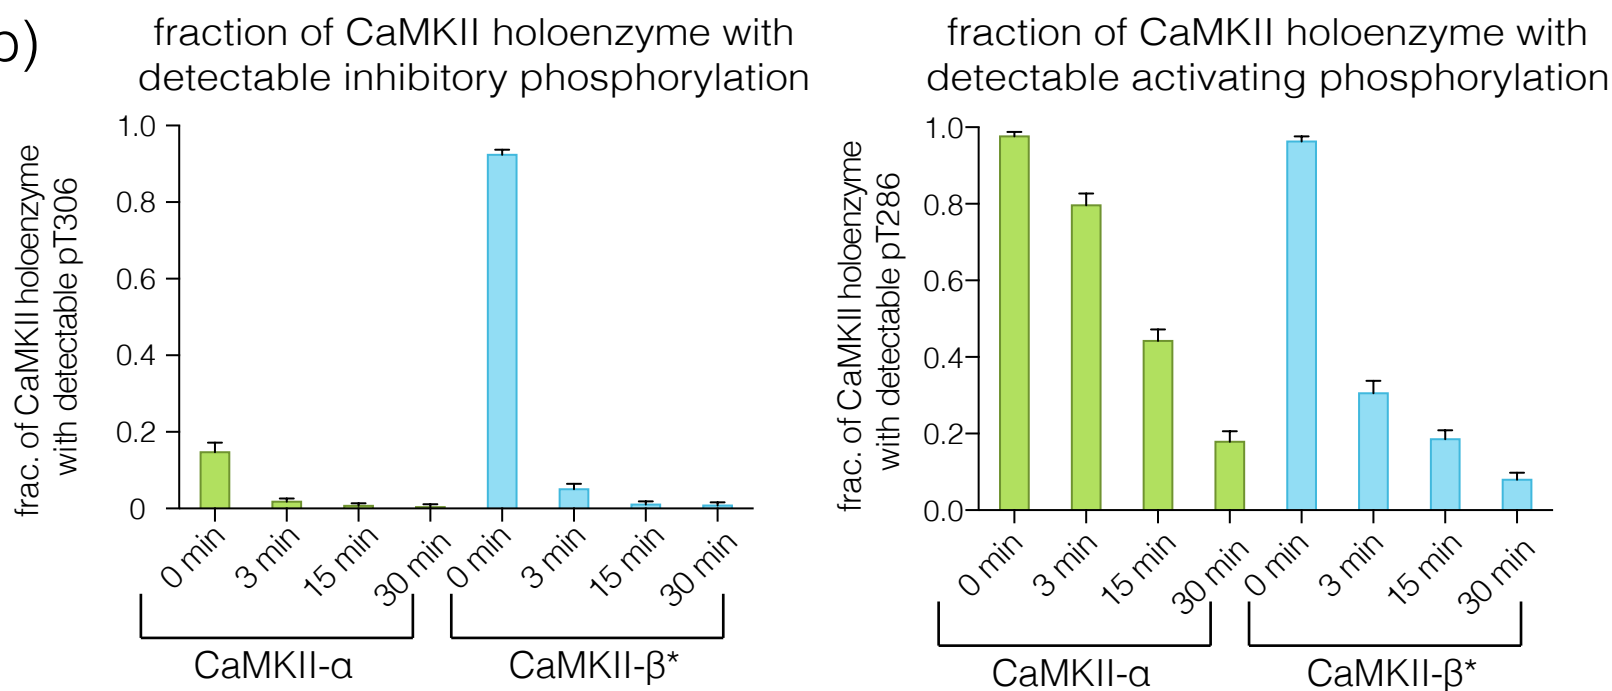

(c)

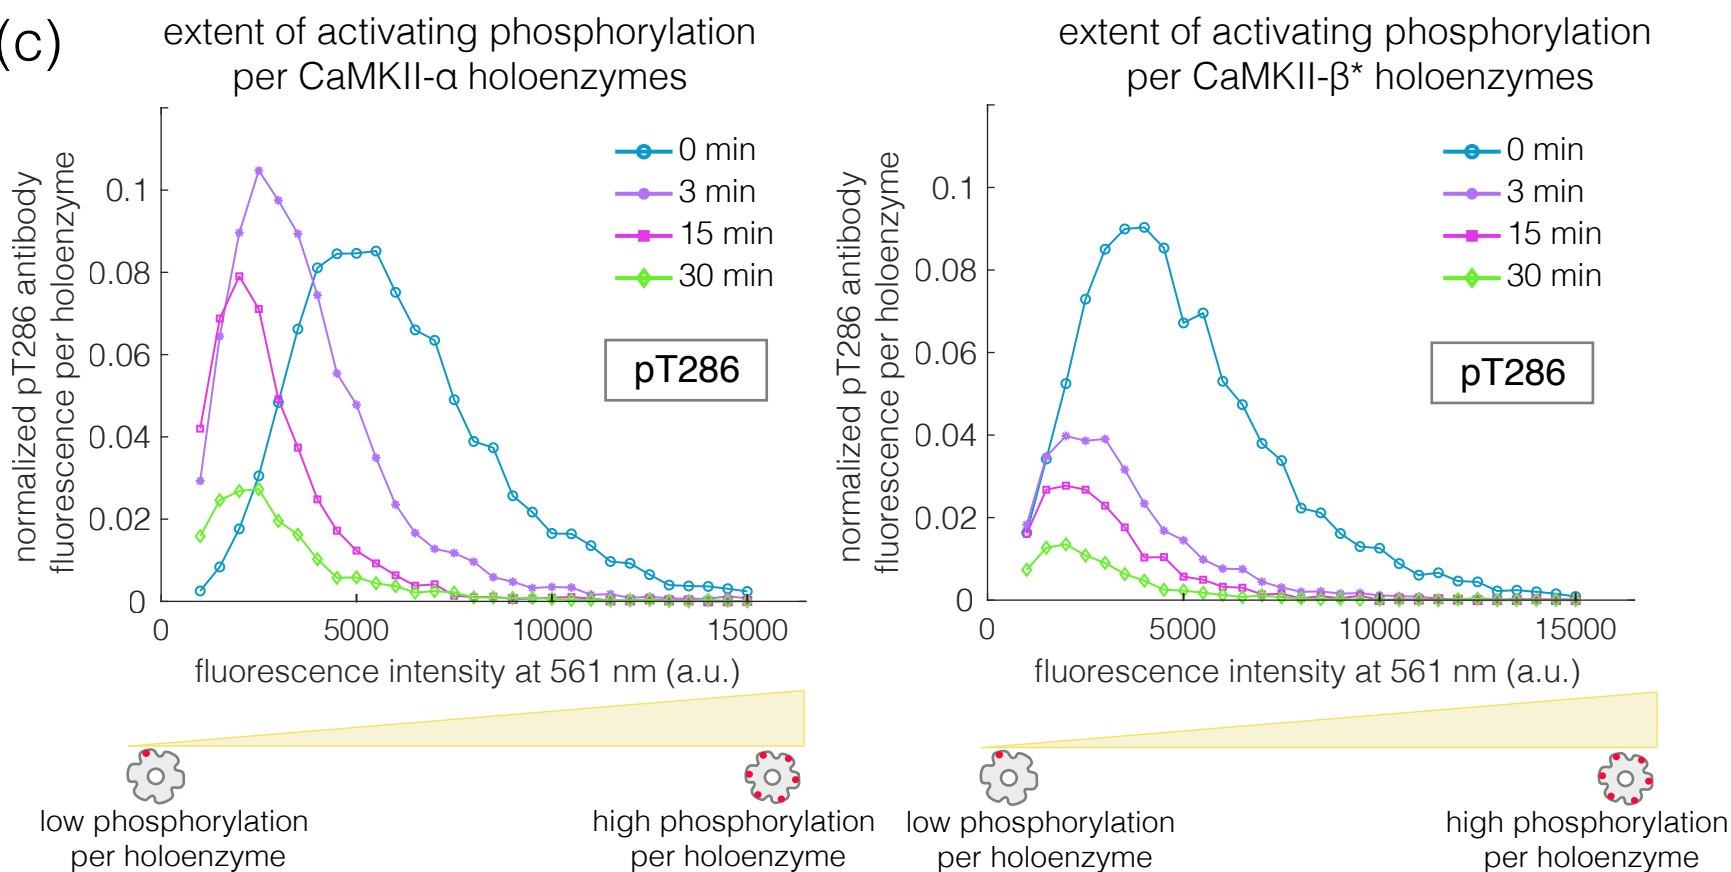

Supplement: supp [file elife-53670-supp-v1.zip › elife_poa_e53670_Figure_7_figure_supplement_2.pdf]
